# Supplementary material
Source: PubMed Central journal article supplement (PMC6842437)
Supplement: NIHMS1537633-supplement-2.pdf [file NIHMS1537633-supplement-2.pdf]

Figure S1, Related to Figure 1.

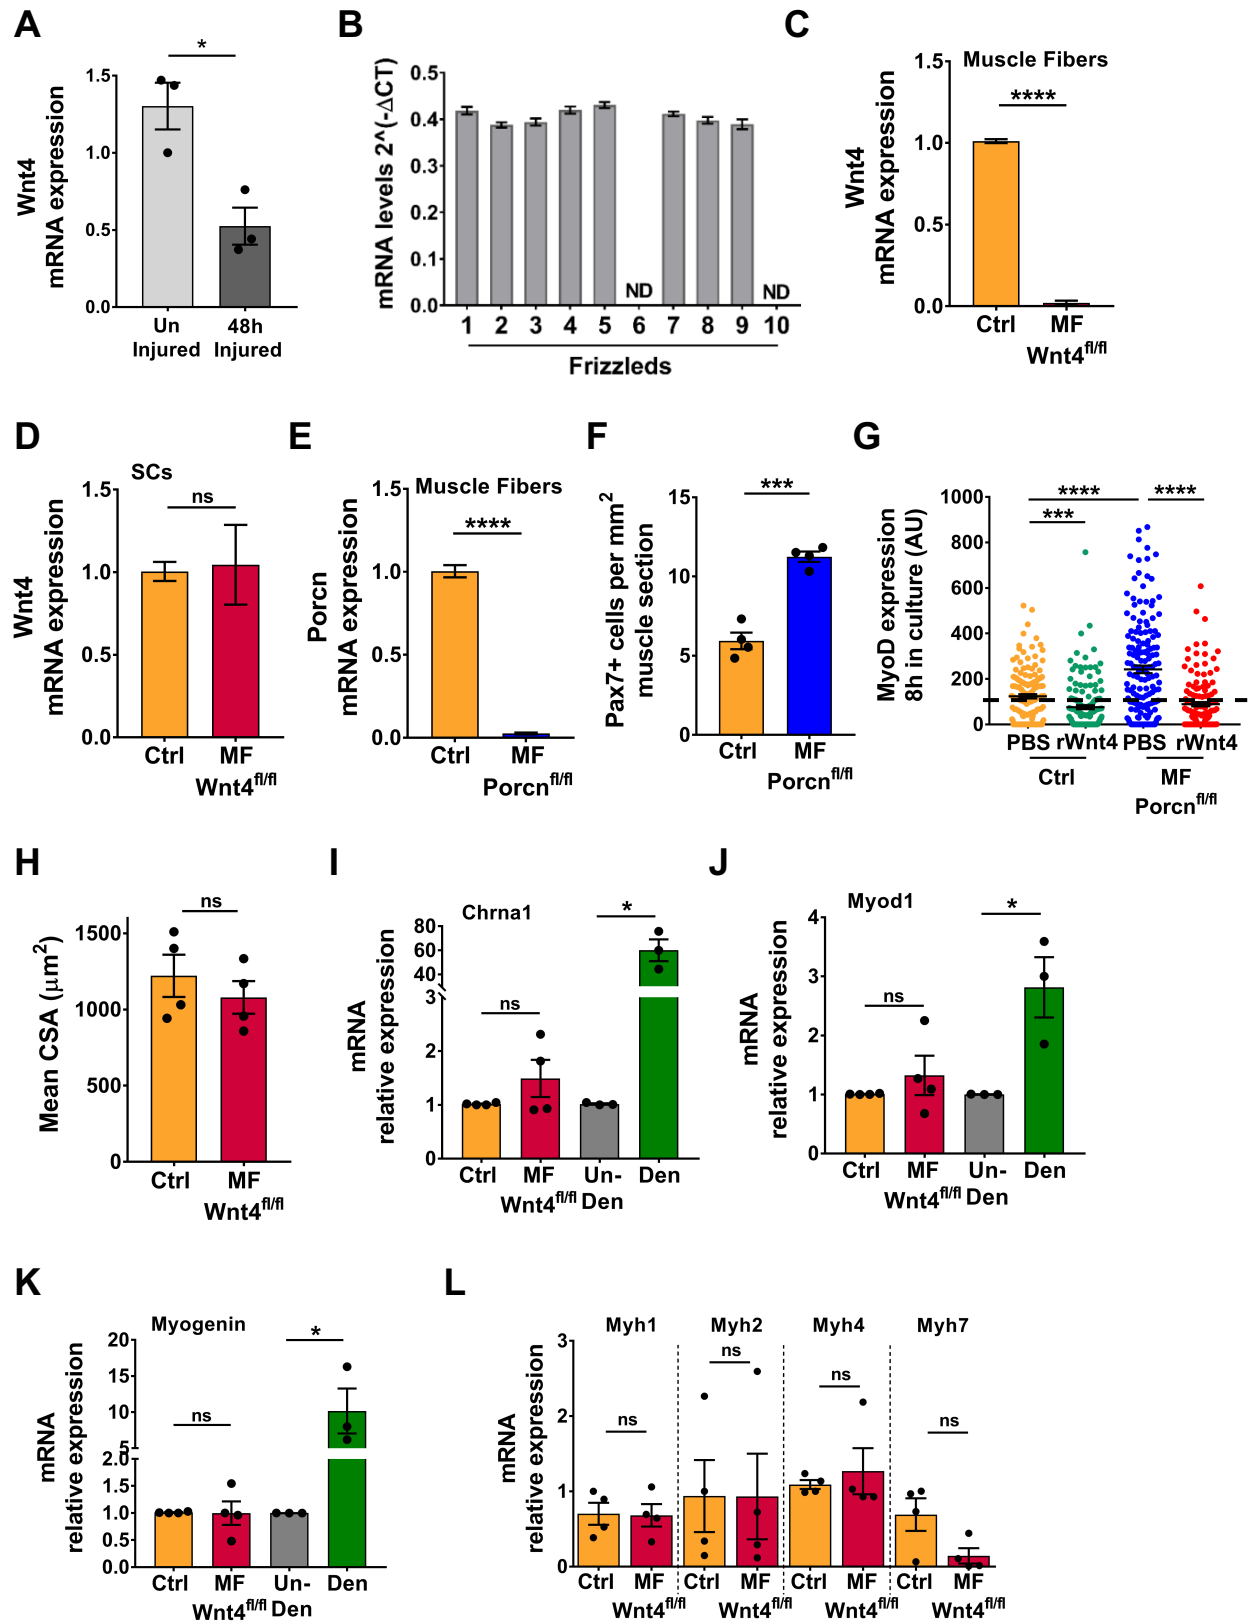

**Figure S1, related to Figure 1. Wnt4 deletion has no effect on muscle fibers at tissue homeostasis.**

(A) Wnt4 mRNA expression by qRT-PCR from wildtype uninjured and 48h injured whole TA muscle.

(B) qRT-PCR of Frizzled expression in FACS isolated wildtype adult SCs.

(C and D) qRT PCR for Wnt4 expression in control and Myofiber-Wnt4<sup>fl/fl</sup> single muscle fibers (n=7) (C) and in isolated SCs (n=3) (D), analyzed 14d post tmx.

(E) Porcn mRNA expression in Control and Myofiber-Porcn<sup>fl/fl</sup> muscle fibers, 14d post tmx (n=3).

(F) Quantification of Pax7<sup>+</sup> cells per 1mm<sup>2</sup> TA muscle section from Control and Myofiber-Porcn<sup>fl/fl</sup> mice, 14d post tmx (n=4).

(G) MyoD expression in SCs on single muscle fibers from Control and Myofiber-Porcn<sup>fl/fl</sup> treated with recombinant Wnt4 (rWnt4) for 8h *in vitro* (n=3). The dashed line represents the threshold of intensity visible by eye.

(H) Quantification of the cross-sectional area of fibers in uninjured Control and Myofiber-Wnt4<sup>fl/fl</sup> TA muscle sections at tissue homeostasis (n=4).

(I, J and K) qRT PCR for denervation genes, Chrn1 (I), Myod1 (J) and Myogenin (K) in control and Myofiber-Wnt4<sup>fl/fl</sup> single muscle fibers, 14d post tmx (n=>3). Fibers from EDL muscle of denervated and un-denervated mice were used as controls (n=3).

(L) qRT PCR for myosin expression in control and Myofiber-Wnt4<sup>fl/fl</sup> muscle fibers isolated from the EDL muscle, analyzed 14d post tmx (n=4)

Error bars, s.e.m.; \*P<0.05, \*\*\*P<0.001, \*\*\*\*P<0.0001.

Figure S2, Related to Figure 2.

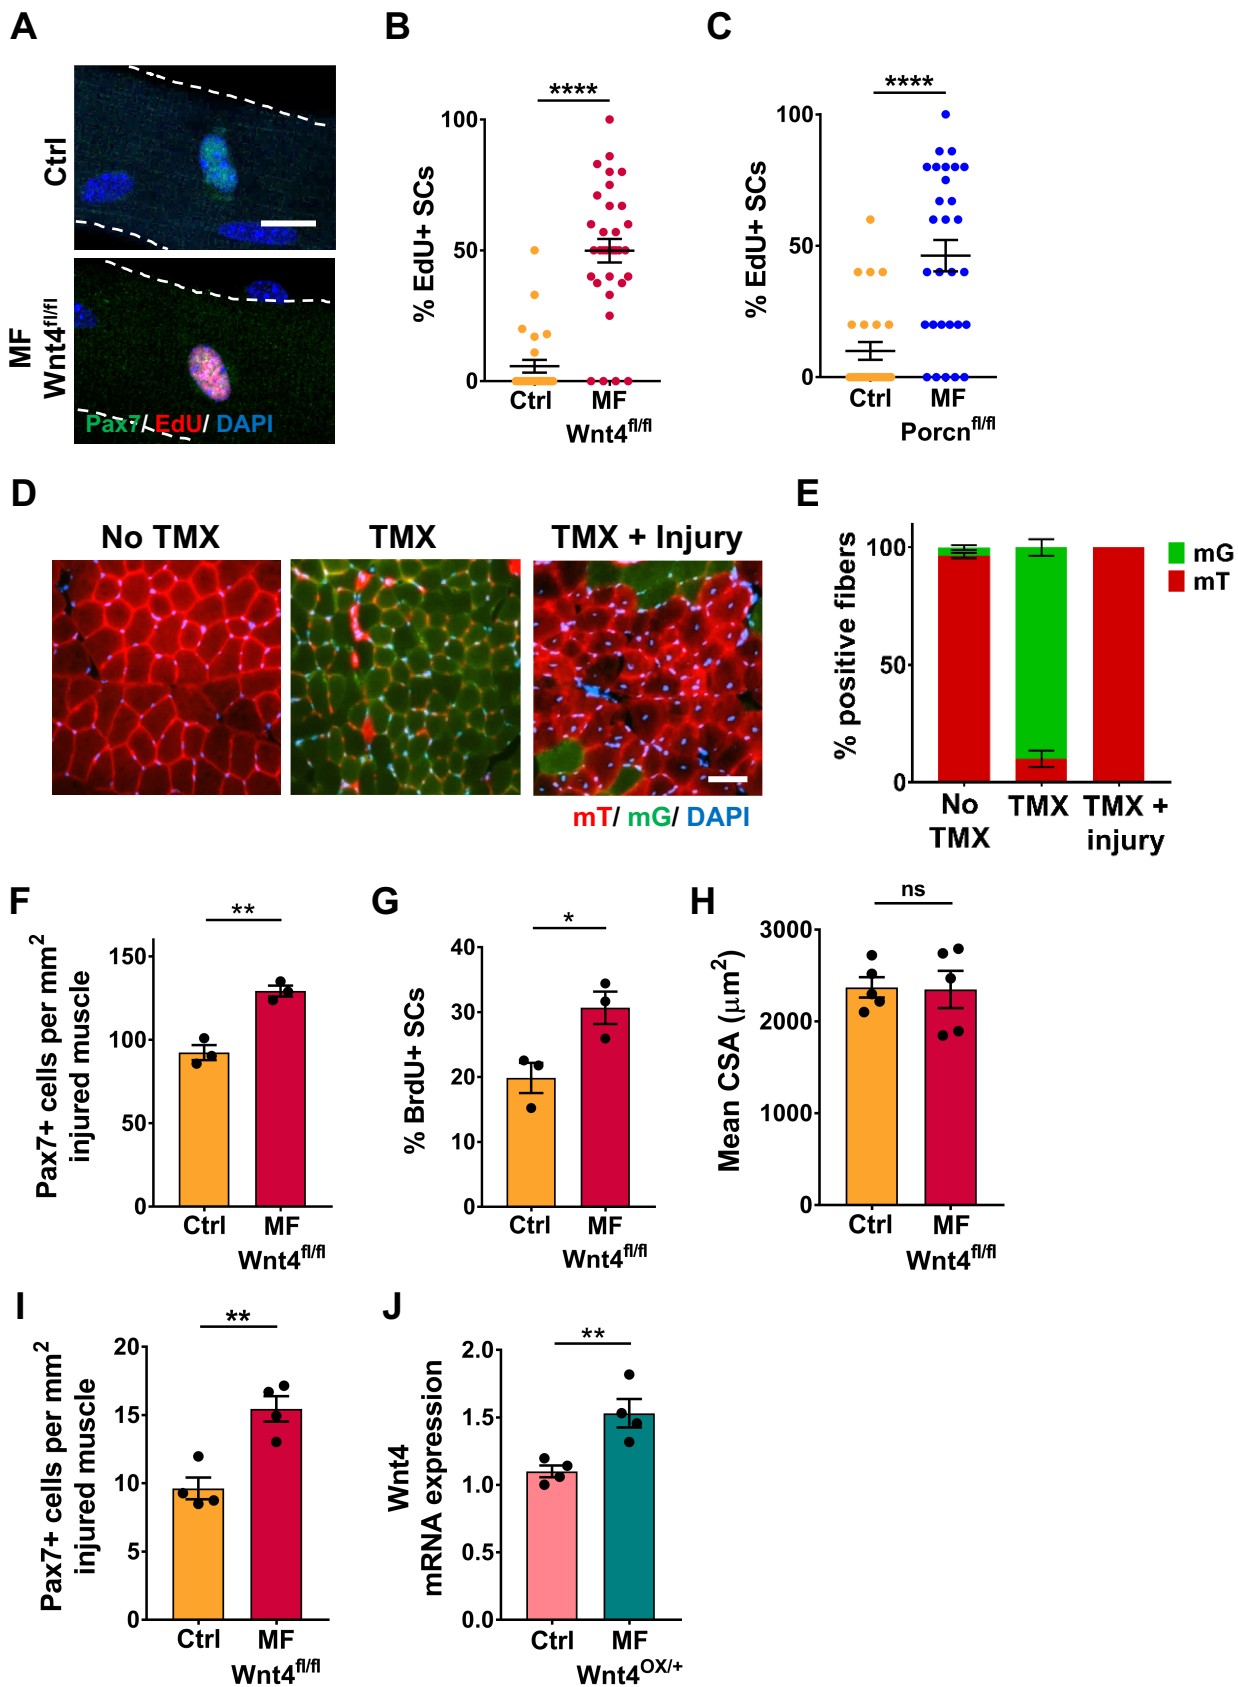

**Figure S2, related to Figure 2. Loss of myofiber Wnt4 causes SCs to proliferate faster *in vitro* and *in vivo* after injury.**

(A and B) Representative images (A) and quantification (B) of the percentage of EdU<sup>+</sup> SCs after culturing Control and Myofiber-Wnt4<sup>fl/fl</sup> single muscle fibers for 30hrs after isolation (n=3).

(C) Percentage of EdU<sup>+</sup> SCs after culturing Control and Myofiber-Porc<sup>fl/fl</sup> single muscle fibers for 30hrs after isolation (n=3).

(D and E) Representative images (D) and quantification (E) of HSA<sup>CreMER</sup> - mTmG reporter expression.

(F) Quantification of the number of Pax7 SCs per mm<sup>2</sup> of Control and Myofiber-Wnt4<sup>fl/fl</sup> TAs injured and regenerated for 6d (n=3).

(G) Percentage of BrdU<sup>+</sup> SCs in control and Myofiber-Wnt4<sup>fl/fl</sup> TAs injured and regenerated for 6d. The mice were injected with BrdU 12h before the TA muscle was isolated (n=3).

(H) Quantification of the cross-sectional area of fibers in injured Control and Myofiber-Wnt4<sup>fl/fl</sup> TA muscle sections, 35d post injury (n=5).

(I) Quantification of the number of Pax7<sup>+</sup> SCs per mm<sup>2</sup> of Control and Myofiber-Wnt4<sup>fl/fl</sup> TAs injured and regenerated for 35d (n=4).

(J) Wnt4 mRNA expression by qRT-PCR on Control and Myofiber-Wnt4<sup>OX/+</sup> single muscle fibers, 14d post tmx (n=4).

Error bars, s.e.m.; \*P<0.05, \*\*P<0.01, \*\*\*\*P<0.0001. Scale bar 10μm in (A), 50μm in (D).



**Figure S3, Related to Figure 3.**

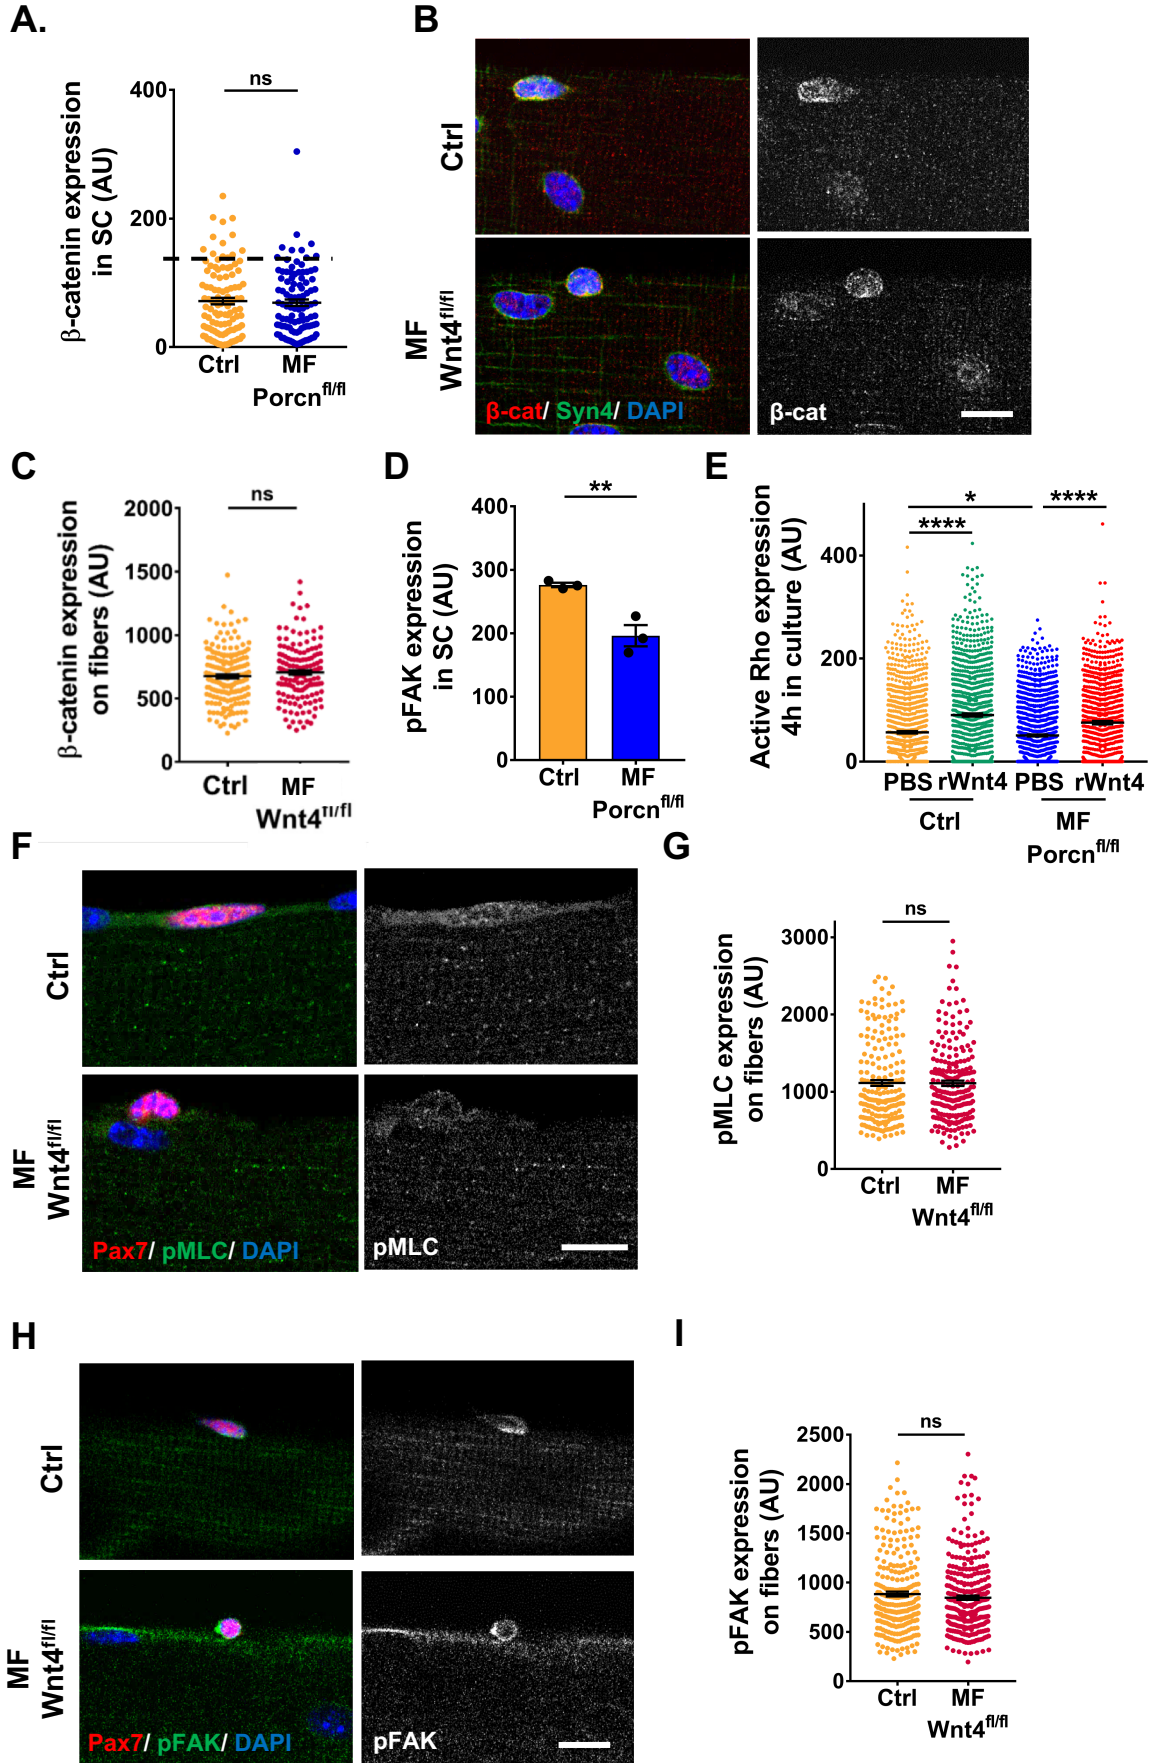

**Figure S3, related to Figure 3. Myofiber Wnt4 does not affect canonical  $\beta$ -catenin and cytoskeletal signaling in muscle fibers at tissue homeostasis.**

(A) Quantification of active  $\beta$ -catenin levels in fiber associated SCs from Myofiber-Porc<sup>n<sup>f/f</sup></sup> compared to control SCs, 14d post tmx (n=3). The dashed line represents the threshold of intensity visible by eye.

(B and C) Representative images (B) and quantification (C) of active  $\beta$ -catenin expression in muscle fibers of control and Myofiber-Wnt4<sup>n<sup>f/f</sup></sup>, 14d post tmx (n=3)

(D) Quantification of pFAK expression in Control and Myofiber-Porc<sup>n<sup>f/f</sup></sup> SCs, 14d post tmx (n=3).

(E) Active Rho levels in FACS isolated SCs from Control and Myofiber-Porc<sup>n<sup>f/f</sup></sup> treated with recombinant Wnt4 (rWnt4) for 4h *in vitro* (n=3).

(F and G) Representative images (F) and quantification (G) of pMLC expression in control and Myofiber-Wnt4<sup>n<sup>f/f</sup></sup> muscle fibers, 14d post tmx (n=3).

(H and I) Representative images (H) and quantification (I) of pFAK expression levels in control and Myofiber-Wnt4<sup>n<sup>f/f</sup></sup> muscle fibers, 14d post tmx (n=3).

Error bars, s.e.m.; \*P<0.05, \*\*P<0.01, \*\*\*\*P<0.0001. Scale bars 10 $\mu$ m in (B, F and H).

Figure S4, Related to Figure 4.

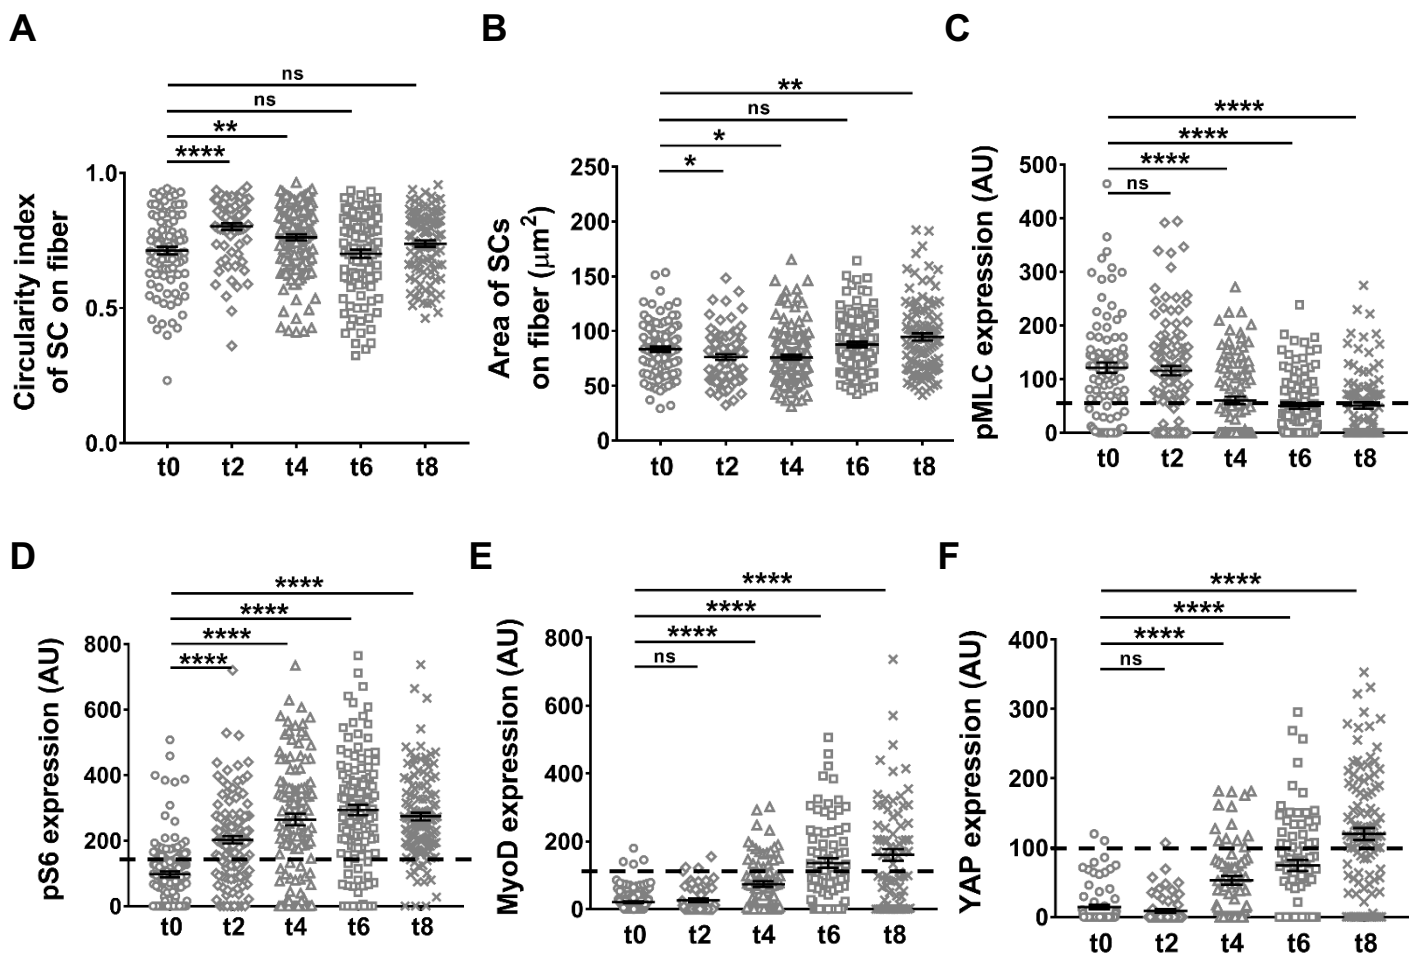

**Figure S4, related to Figure 4. Quiescence to activation transition of SCs is characterized by morphological and cytoskeletal changes preceding onset of activation markers.**

(A) Circularity index of WT SCs on single muscle fibers cultured *in vitro* for different time points (n=3).

(B) Area of WT SCs on muscle fibers cultured *in vitro* for different time points (n=3).

(C) pMLC expression of WT SCs on single muscle fibers cultured *in vitro* for different time points (n=3).

(D) pS6 expression of WT SCs on single muscle fibers cultured *in vitro* for different time points (n=3).

(E) MyoD expression of WT SCs on single muscle fibers cultured *in vitro* for different time points (n=3).

(F) YAP expression of WT SCs on single muscle fibers cultured *in vitro* for different time points (n=3).

The dashed line in Figures S4C, S4D, S4E and S4F represents the threshold of intensity visible by eye.

Error bars, s.e.m; \*P<0.05, \*\*P<0.01, \*\*\*\*P<0.0001.

**Figure S5, Related to Figure 5.**

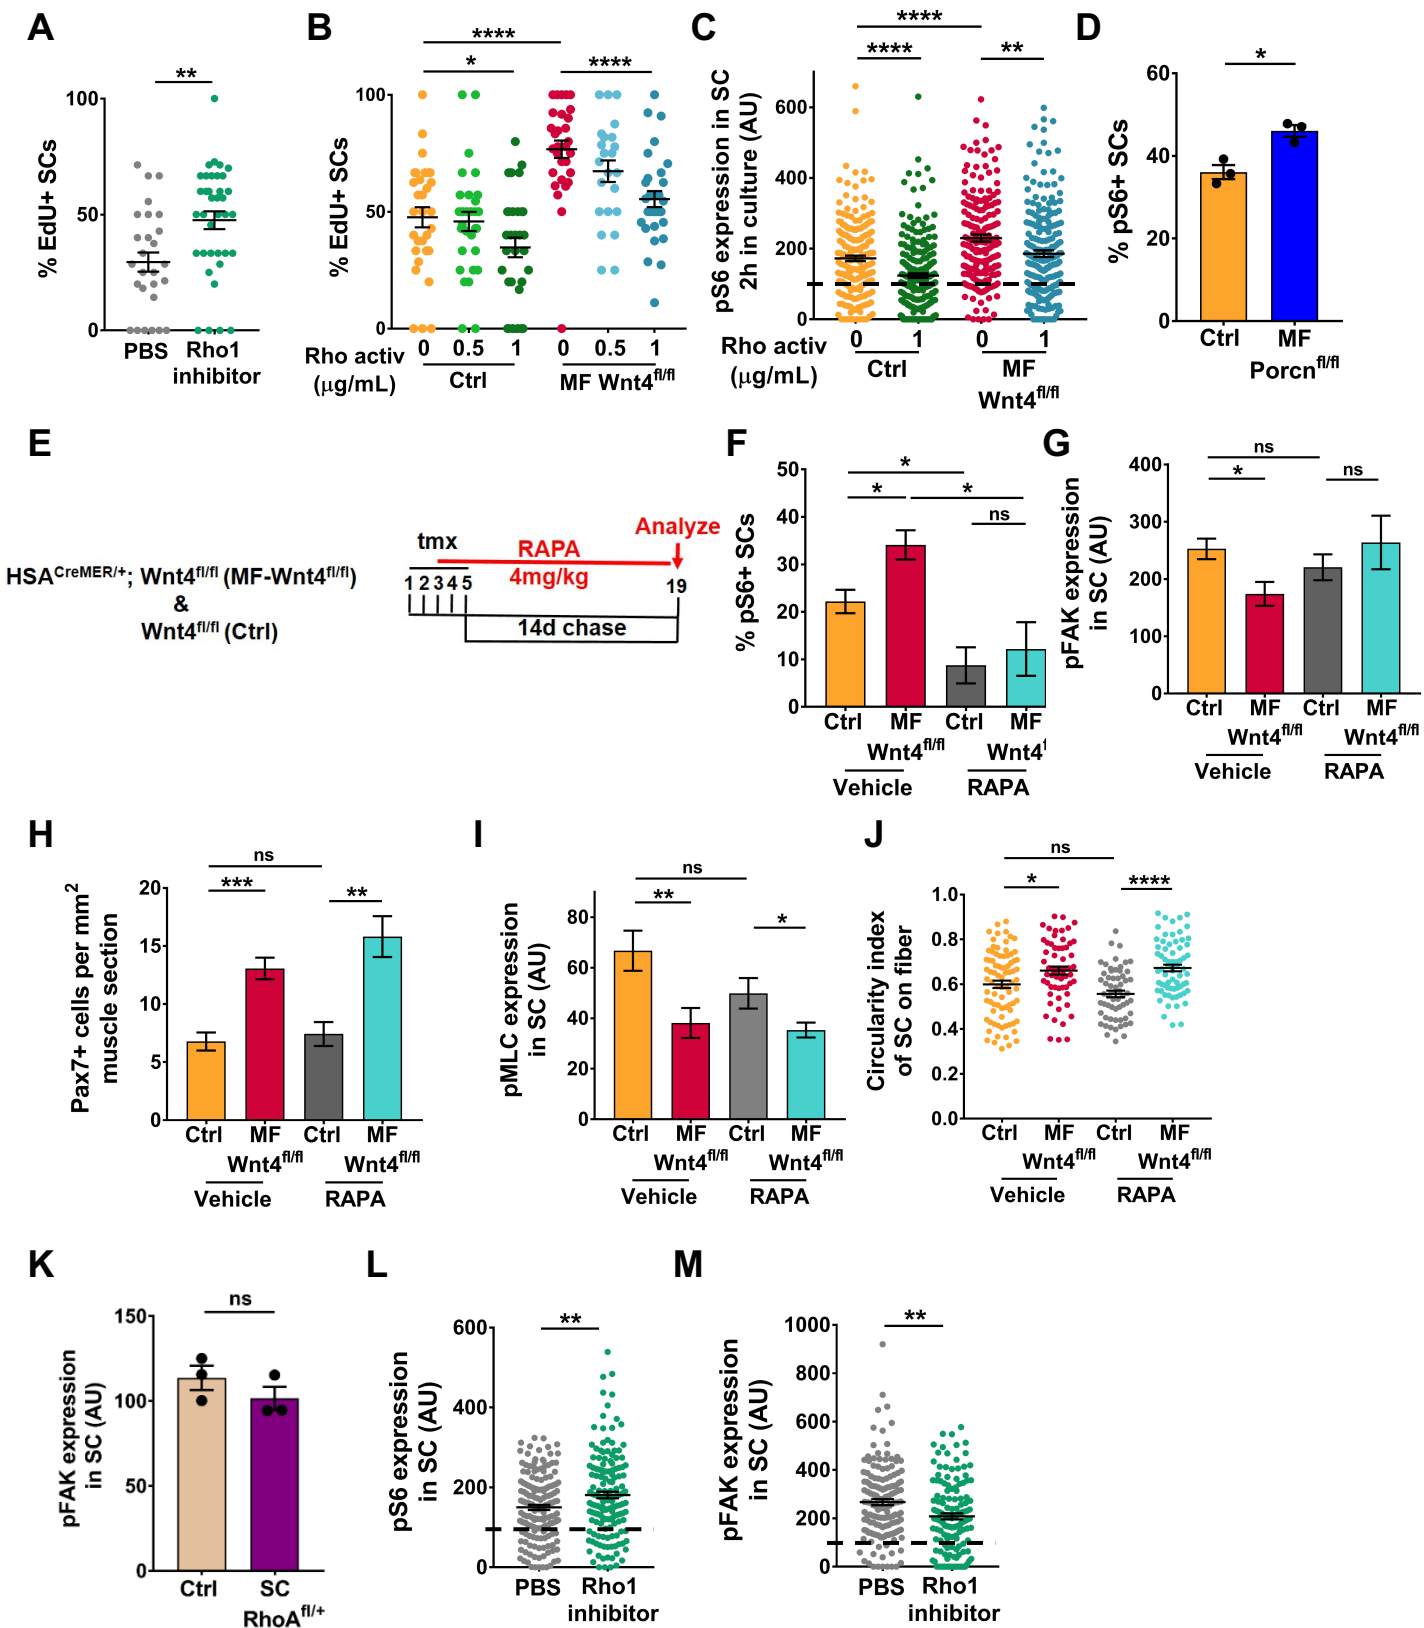

**Figure S5, related to Figure 5. Wnt4-RhoA signaling axis in QSC does not require activation of mTORC1 to enter cell cycle.**

(A) Quantification of the percentage of EdU<sup>+</sup> SCs on single muscle fibers isolated from wildtype mice treated with PBS or Rho1 inhibitor for 30h *in vitro* (n=2).

(B) Quantification of the percentage of EdU<sup>+</sup> SCs on single muscle fibers from Control and Myofiber-Wnt4<sup>fl/fl</sup> treated with Rho activator for 36h *in vitro* (n=3).

(C) pS6 expression in SCs on single muscle fibers from Control and Myofiber-Wnt4<sup>fl/fl</sup> treated with Rho activator for 2h *in vitro* (n=3).

(D) Quantification of the percentage of pS6<sup>+</sup> SCs on Control and Myofiber-Porc<sup>fl/fl</sup> muscle fibers, 14d post tmx (n=3).

(E) Schematic representation of the experimental design.

(F) Quantification of the percentage of pS6<sup>+</sup> SCs in Control and Myofiber-Wnt4<sup>fl/fl</sup> mice, *in vivo* treated with either Vehicle or Rapamycin (n=5).

(G) Quantification of pFAK expression in SCs of Control and Myofiber-Wnt4<sup>fl/fl</sup> mice, *in vivo* treated with either Vehicle or Rapamycin (n=5).

(H) Quantification of the number of Pax7<sup>+</sup> SCs per mm<sup>2</sup> TA muscle in Control and Myofiber-Wnt4<sup>fl/fl</sup> mice, *in vivo* treated with either Vehicle or Rapamycin (n=5).

(I) Quantification of pMLC expression in fiber-associated SCs of Control and Myofiber-Wnt4<sup>fl/fl</sup> mice, *in vivo treated* with either Vehicle or Rapamycin (n=4).

(J) Quantification of the circularity index of fiber-associated SCs in Control and Myofiber-Wnt4<sup>fl/fl</sup> mice, *in vivo* treated with either Vehicle or Rapamycin (n=5).

(K) Quantification of pFAK expression in fiber associated SCs in SC-RhoA<sup>fl/+</sup> SCs compared to Control SCs, 14d post tmx (n=3).

(L) Isolated wildtype single muscle fibers treated with PBS or Rho1 inhibitor for 2h *in vitro* and analyzed for pS6 expression in SCs (n=2).

(M) Isolated wildtype single muscle fibers treated with PBS or Rho1 inhibitor for 2h *in vitro* and analyzed for pFAK expression in SCs (n=2).

The dashed line in Figures S5C, S5L and S5M represents the threshold of intensity visible by eye.

Error bars, s.e.m.; \*P<0.05, \*\*P<0.01, \*\*\*P<0.001, \*\*\*\*P<0.0001.

**Table S1, related to Figure 1. Microarray expression profile of Wnt ligands in adult muscle fibers (Log2 values).**

|        | <b>Adult muscle fibers (n1)</b> | <b>Adult muscle fibers (n2)</b> |
|--------|---------------------------------|---------------------------------|
| Wnt1   | 4.563                           | 4.982                           |
| Wnt2   | 5.640                           | 5.734                           |
| Wnt2B  | 5.432                           | 6.331                           |
| Wnt3   | 5.077                           | 5.623                           |
| Wnt3A  | 5.526                           | 6.062                           |
| Wnt4   | 8.193                           | 8.047                           |
| Wnt5A  | 5.686                           | 6.660                           |
| Wnt5B  | 6.257                           | 6.851                           |
| Wnt6   | 6.143                           | 6.156                           |
| Wnt7A  | 5.074                           | 5.478                           |
| Wnt7B  | 5.430                           | 6.238                           |
| Wnt8A  | 5.755                           | 5.554                           |
| Wnt8B  | 4.075                           | 4.869                           |
| Wnt9A  | 7.254                           | 7.419                           |
| Wnt9B  | 5.877                           | 6.607                           |
| Wnt10A | 6.395                           | 7.160                           |
| Wnt10B | 5.640                           | 6.048                           |
| Wnt11  | 6.763                           | 7.288                           |
| Wnt16  | 5.840                           | 5.999                           |

**Table S2, related to STAR Methods. Primers used for qRT-PCR analysis.**

| <b>Primer</b> | <b>Forward Sequence 5' to 3'</b> | <b>Reverse Primer 5' to 3'</b> |
|---------------|----------------------------------|--------------------------------|
| Fzd1          | CAAGGTTTACGGGCTCATGT             | GTAACAGCCGGACAGGAAAA           |
| Fzd2          | GAGGTGCATCAGTTCTACCC             | ATGGCCTGCTCCAGCACT             |
| Fzd3          | GCAGATAGGTGGGCACAGTT             | AAAGAAATGGCCGAAAATCC           |
| Fzd4          | CACGCCGCTCATCCAGTA               | GCCGATGGGGATGTTGAT             |
| Fzd5          | CAACCATGACACGCAGGAC              | GGGCGTGTACATAGAGCACA           |
| Fzd6          | TTCCCTAACCTGATGGGTCA             | ACATTTCAATGTTTGGTGAACA         |
| Fzd7          | ATATCGCCTACAACCAGACCATCC         | AAGGAACGGCACGGAGGAATG          |
| Fzd8          | ATGGAGTGGGGTTACCTGTTG            | CACCGTGATCTCTTGGCAC            |
| Fzd9          | GTCCGCGTTGTGTTTCTTCT             | CAGACCCTCCTGGATCACAT           |
| Fzd10         | GTACCCCGAACGTCCATCA              | GTGCTCTCCAGTCCTCCTG            |
| Wnt1          | TTCGGCAAGATCGTCAACCG             | GCCAAAGAGGCGACCAAATC           |
| Wnt2          | CTCGGTGGAATCTGGCTCTG             | CACATTGTCACACATCACCT           |

|          |                         |                         |
|----------|-------------------------|-------------------------|
| Wnt2B    | GGAGGCAGCGTTCGTCTATG    | CGCGGGTATATGGGTCACAG    |
| Wnt3     | AGCGTAGCAGAAGGTGTGAAG   | CCAGGTGGCCCCTTATGATG    |
| Wnt3A    | CAGGAACTACGTGGAGATCATGC | CGTGTCACTGCGAAAGCTACT   |
| Wnt4     | AGACGTGCGAGAACTCAAAG    | GGAAGTGGTATTGGCACTCCT   |
| Wnt5A    | CAACTGGCAGGACTTTCTCAA   | CATCTCCGATGCCGGAAGT     |
| Wnt5B    | TCCTGGTGGTCACTAGCTCTG   | TGCTCCTGATACAACTGACACA  |
| Wnt6     | TCCTCTACGCAGCCGATTCA    | CGGCACAGACAGTTCTCCTC    |
| Wnt7A    | TGAACTTACACAATAACGAGGCG | GTGGTCCAGCACGTCTTAGT    |
| Wnt7B    | CTTCACCTATGCCATCACGG    | TGGTTGTAGTAGCCTTGCTTCT  |
| Wnt8A    | AGTGAACAACCTCCTGATAACCG | GAATGAAGGATGTCTCTCTCGTG |
| Wnt8B    | CCCGTGTGCGTTCTTCTAGTC   | AGTAGACCAGGTAAGCCTTTGG  |
| Wnt9A    | GGCCCAAGCACACTACAAG     | AGAAGAGATGGCGTAGAGGAAA  |
| Wnt9B    | TCCTGTGCTGTTTCGTACCTG   | CCGTGTCATAGCGTAGCTTCA   |
| Wnt10A   | GCTCAACGCCAACACAGTG     | CGAAAACCTCGGCTGAAGATG   |
| Wnt10B   | GAAGGGTAGTGGTGAGCAAGA   | GGTTACAGCCACCCCATTC     |
| Wnt11    | GCTGGCACTGTCCAAGACTC    | CTCCCGTGTACCTCTCTCCA    |
| Wnt16    | CAGGGCAACTGGATGTGGTT    | CTAGGCAGCAGGTACGGTT     |
| Porc1    | CTGCCTACTGTCCAACAGGG    | GCATGCTTCAGGTAAGACGG    |
| Axin2    | TGACTCTCCTTCCAGATCCA    | TGCCACACTAGGCTGACA      |
| MyoD     | CCACTCCGGGACATAGACTTG   | AAAAGCGCAGGTCTGGTGAG    |
| Myogenin | GAGACATCCCCTATTTCTACCA  | GCTCAGTCCGCTCATAGCC     |
| Chrna    | ACCTGGACCTATGACGGCTCT   | AGTTACTCAGGTCGGGCTGGT   |
| Myh1     | GCGAATCGAGGCTCAGAACAA   | GTAGTTCCGCCTTCGGTCTTG   |
| Myh2     | GCACCCATCCTCATTTTCGTGA  | GGAATGGCACTTGCGTTTAACA  |
| Myh4     | AGGACCAACTGAGTGAAGTGA   | GGGAAAACCTCGCCTGACTCTG  |
| Myh7     | ACTGTCAACACTAAGAGGGTCA  | TTGGATGATTTGATCTTCCAGGG |
| GAPDH    | GGCAAAGTGGAGATTGTTC     | AATTTGCCGTGAGTGGAGTC    |
